# Supplementary material for: Synthesis and characterization of hydrophilic functionalized organosilicon copolymers containing triazole and silylimidate/silylacrylate groups
Source: Royal Society of Chemistry journal article supplement (doi:10.1039/d2py00681b), 2022-01-01
Supplement: d2py00681b1.pdf [file d2py00681b1.pdf]

## Electronic Supplementary Information

### Synthesis and characterization of hydrophilic functionalized organosilicon copolymers containing triazole and silylimidate/silylacrylate groups

Alexander S. Pozdnyakov,\* Nadezhda P. Kuznetsova, Anastasia A. Ivanova, Yuliya I. Bolgova, Tatyana A. Semenova, Olga M. Trofimova and Artem I. Emel'yanov

*A.E. Favorsky Irkutsk Institute of Chemistry, Siberian Branch of the Russian Academy of Sciences, 1 Favorsky Str., Irkutsk, 664033, Russian Federation.*

#### Table of Contents

|    |                                                                                                                          |     |
|----|--------------------------------------------------------------------------------------------------------------------------|-----|
| 1  | <b>Figure S1</b> Molecular weight distribution for poly(VT- <i>co</i> -BTMSI) <b>P2</b>                                  | S3  |
| 2  | <b>Figure S2</b> Molecular weight distribution for poly(VT- <i>co</i> -BTMSI) <b>P4</b>                                  | S3  |
| 3  | <b>Figure S3</b> Molecular weight distribution for poly(VT- <i>co</i> -BTMSI) <b>P5</b>                                  | S3  |
| 4  | <b>Figure S4</b> Molecular weight distribution for poly(VT- <i>co</i> -BTMSI) <b>P6</b>                                  | S3  |
| 5  | <b>Figure S5</b> FT-IR spectra of poly(VT- <i>co</i> -BTMSI) <b>P3</b> and <b>P5</b>                                     | S4  |
| 6  | <b>Figure S6</b> FT-IR spectra of 1-vinyl-1,2,4-triazole (VT) and N,O-bis(trimethylsilyl)prop-2-enecarboximidate (BTMSI) | S4  |
| 7  | <b>Figure S7</b> <sup>1</sup> H NMR spectrum of copolymer <b>P3</b>                                                      | S5  |
| 8  | <b>Figure S8</b> <sup>13</sup> C NMR spectrum of copolymers <b>P3</b>                                                    | S5  |
| 9  | <b>Figure S9</b> <sup>1</sup> H NMR spectrum of copolymer <b>P4</b>                                                      | S6  |
| 10 | <b>Figure S10</b> <sup>13</sup> C NMR spectrum of copolymers <b>P4</b>                                                   | S6  |
| 11 | <b>Figure S11</b> <sup>1</sup> H NMR spectrum of copolymer <b>P5</b>                                                     | S7  |
| 12 | <b>Figure S12</b> <sup>13</sup> C NMR spectrum of copolymers <b>P5</b>                                                   | S7  |
| 13 | <b>Figure S13</b> <sup>1</sup> H NMR spectrum of copolymer <b>P6</b>                                                     | S8  |
| 14 | <b>Figure S14</b> <sup>13</sup> C NMR spectrum of copolymers <b>P6</b>                                                   | S8  |
| 15 | <b>Figure S15</b> <sup>1</sup> H NMR spectrum of copolymer <b>MP2</b>                                                    | S9  |
| 16 | <b>Figure S16</b> <sup>29</sup> Si NMR spectrum of copolymer <b>MP2</b>                                                  | S9  |
| 17 | <b>Figure S17</b> <sup>1</sup> H NMR spectrum of copolymer <b>MP3</b>                                                    | S10 |
| 18 | <b>Figure S18</b> <sup>13</sup> C NMR spectrum of copolymers <b>MP3</b>                                                  | S10 |
| 19 | <b>Figure S19</b> <sup>29</sup> Si NMR spectrum of copolymer <b>MP3</b>                                                  | S11 |
| 20 | <b>Figure S20</b> <sup>1</sup> H NMR spectrum of copolymer <b>MP4</b>                                                    | S11 |
| 21 | <b>Figure S21</b> <sup>13</sup> C NMR spectrum of copolymers <b>MP4</b>                                                  | S12 |
| 22 | <b>Figure S22</b> <sup>29</sup> Si NMR spectrum of copolymer <b>MP4</b>                                                  | S12 |

|    |                                                                                                 |     |
|----|-------------------------------------------------------------------------------------------------|-----|
| 23 | <b>Figure S23</b> <sup>1</sup> H NMR spectrum of copolymer <b>MP5</b>                           | S13 |
| 24 | <b>Figure S24</b> <sup>13</sup> C NMR spectrum of copolymers <b>MP5</b>                         | S13 |
| 25 | <b>Figure S25</b> <sup>1</sup> H NMR spectrum of copolymer <b>MP6</b>                           | S14 |
| 26 | <b>Figure S26</b> <sup>13</sup> C NMR spectrum of copolymers <b>MP6</b>                         | S14 |
| 27 | <b>Figure S27</b> SEM and EDX of poly(VT- <i>co</i> -BTMSI) <b>P3</b> (various surface regions) | S15 |
| 28 | <b>Table S1</b> Thermal stability of copolymers <b>P2–P6</b>                                    | S15 |
| 29 | Copolymerization constants                                                                      | S15 |
| 30 | Elemental analysis data of <b>MP2–MP6</b> copolymers                                            | S16 |

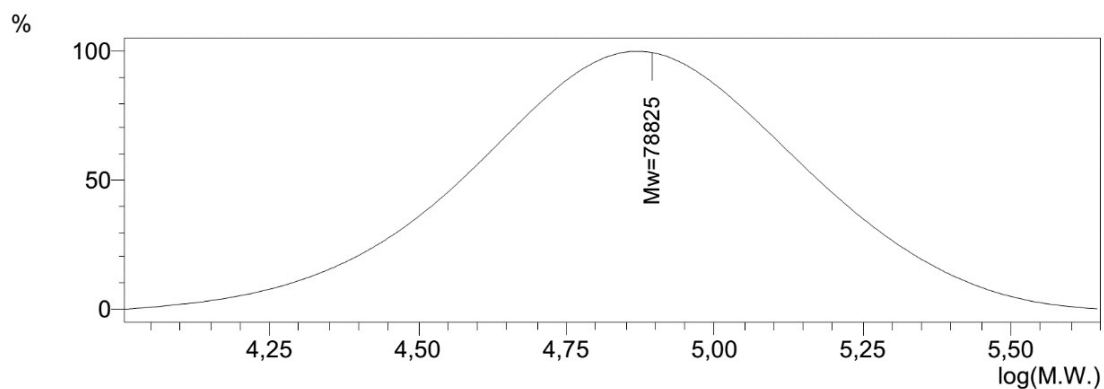

**Fig. S1** Molecular weight distribution for poly(VT-*co*-BTMSI) **P2**.

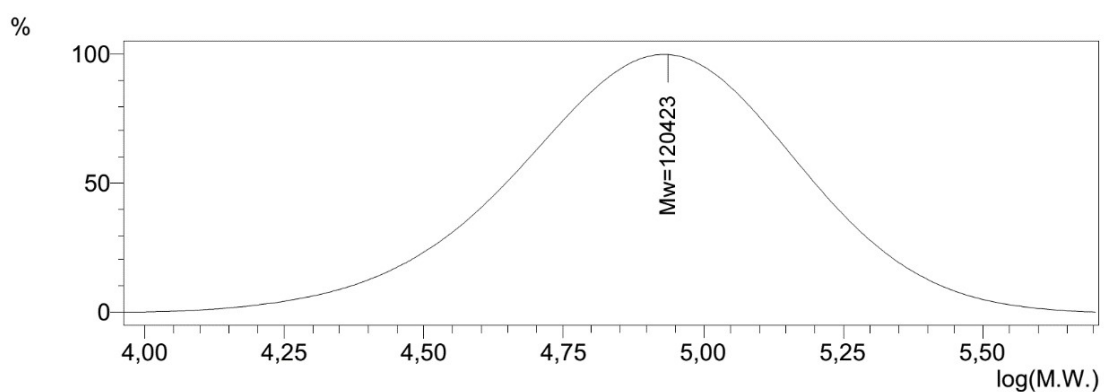

**Fig. S2** Molecular weight distribution for poly(VT-*co*-BTMSI) **P4**.

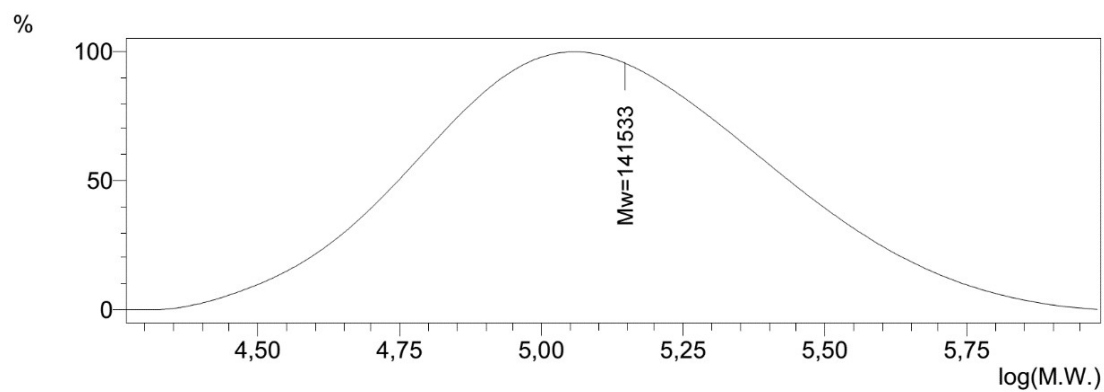

**Fig. S3** Molecular weight distribution for poly(VT-*co*-BTMSI) **P5**.

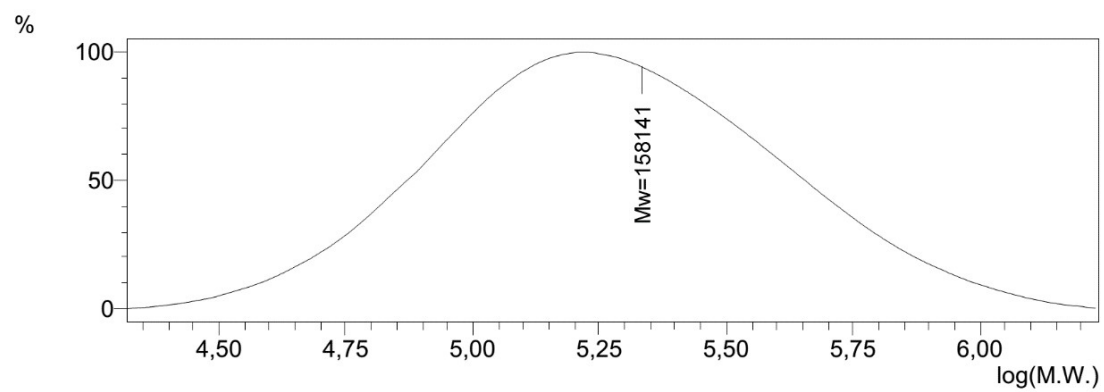

**Fig. S4** Molecular weight distribution for poly(VT-*co*-BTMSI) **P6**.

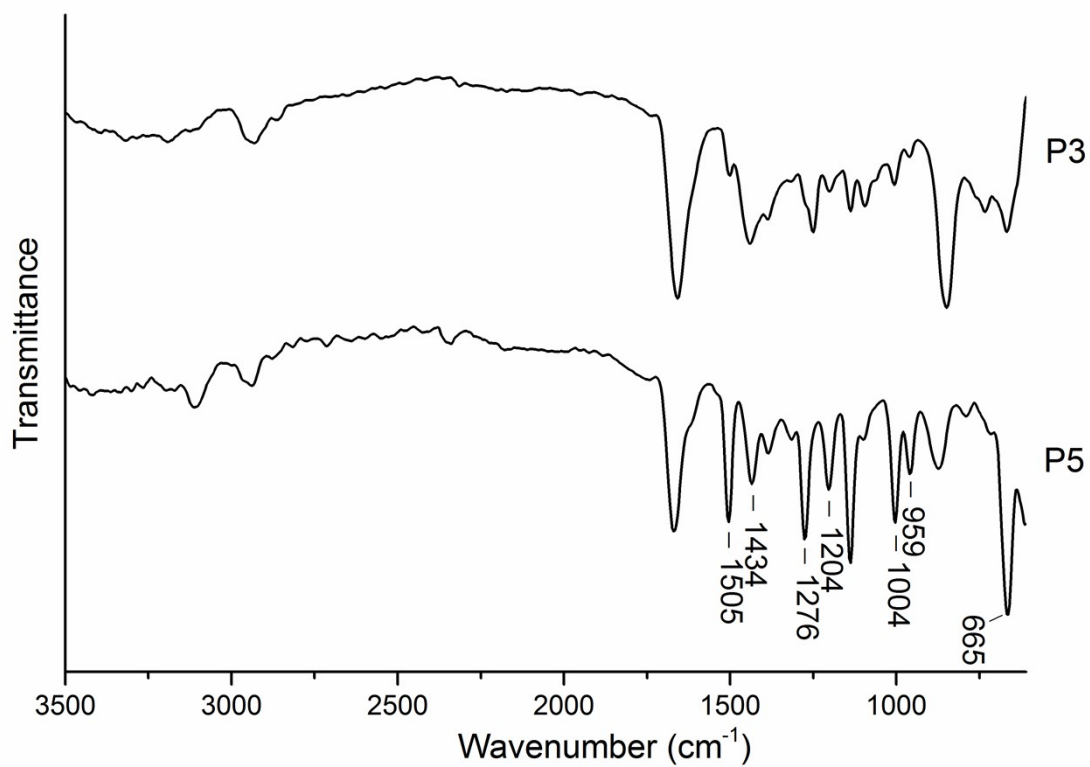

**Fig. S5** FT-IR spectra of poly(VT-co-BTMSI) **P3** and **P5**.

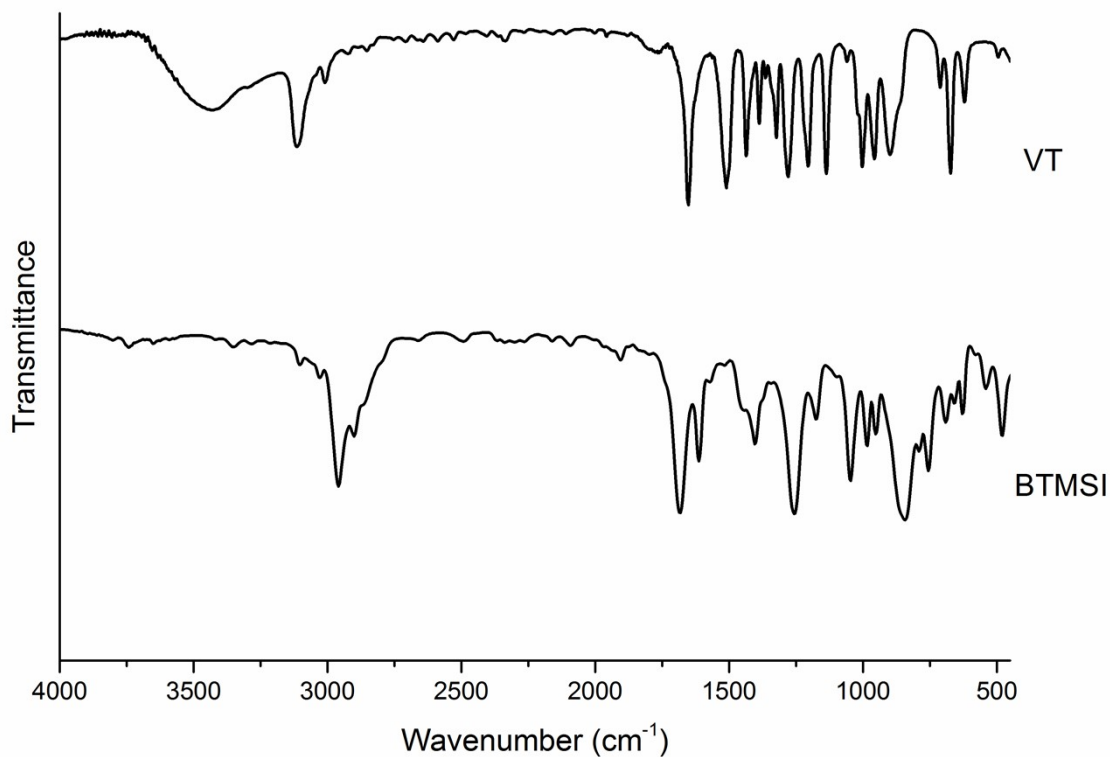

**Fig. S6** FT-IR spectra of 1-vinyl-1,2,4-triazole (VT) and N,O-bis(trimethylsilyl)prop-2-enecarboximidate (BTMSI).

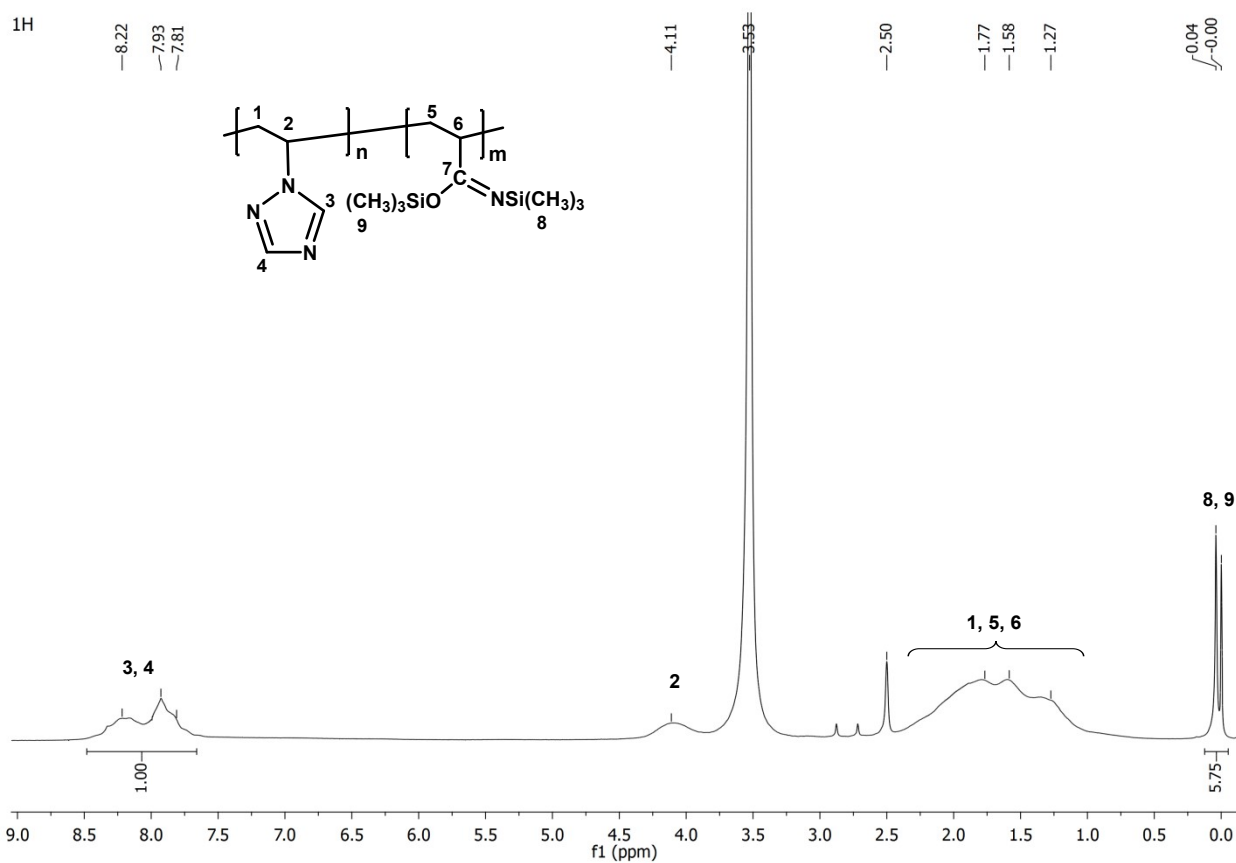

**Fig. S7** <sup>1</sup>H NMR spectrum of copolymer **P3** (400.13 MHz, DMSO-*d*<sub>6</sub>).

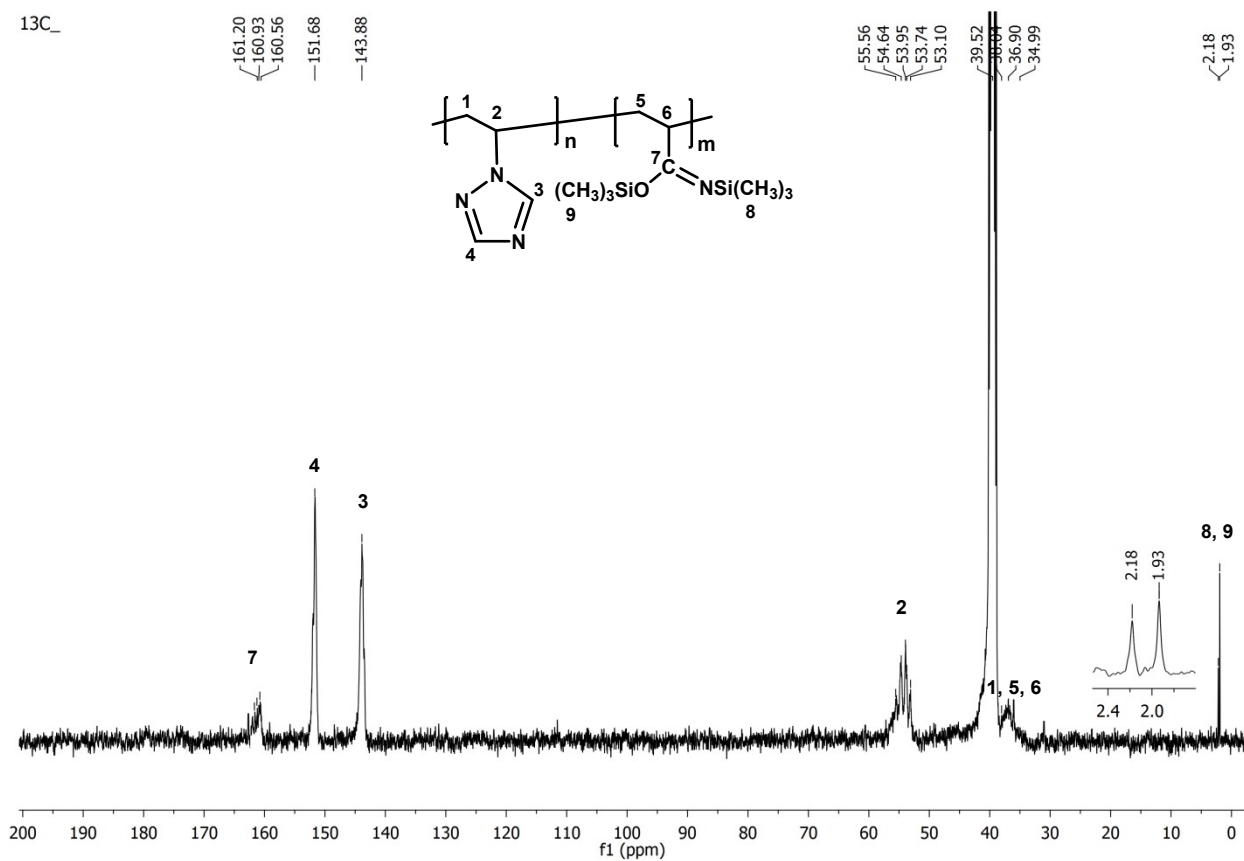

**Fig. S8** <sup>13</sup>C NMR spectrum of copolymer **P3** (100.62 MHz, DMSO-*d*<sub>6</sub>).

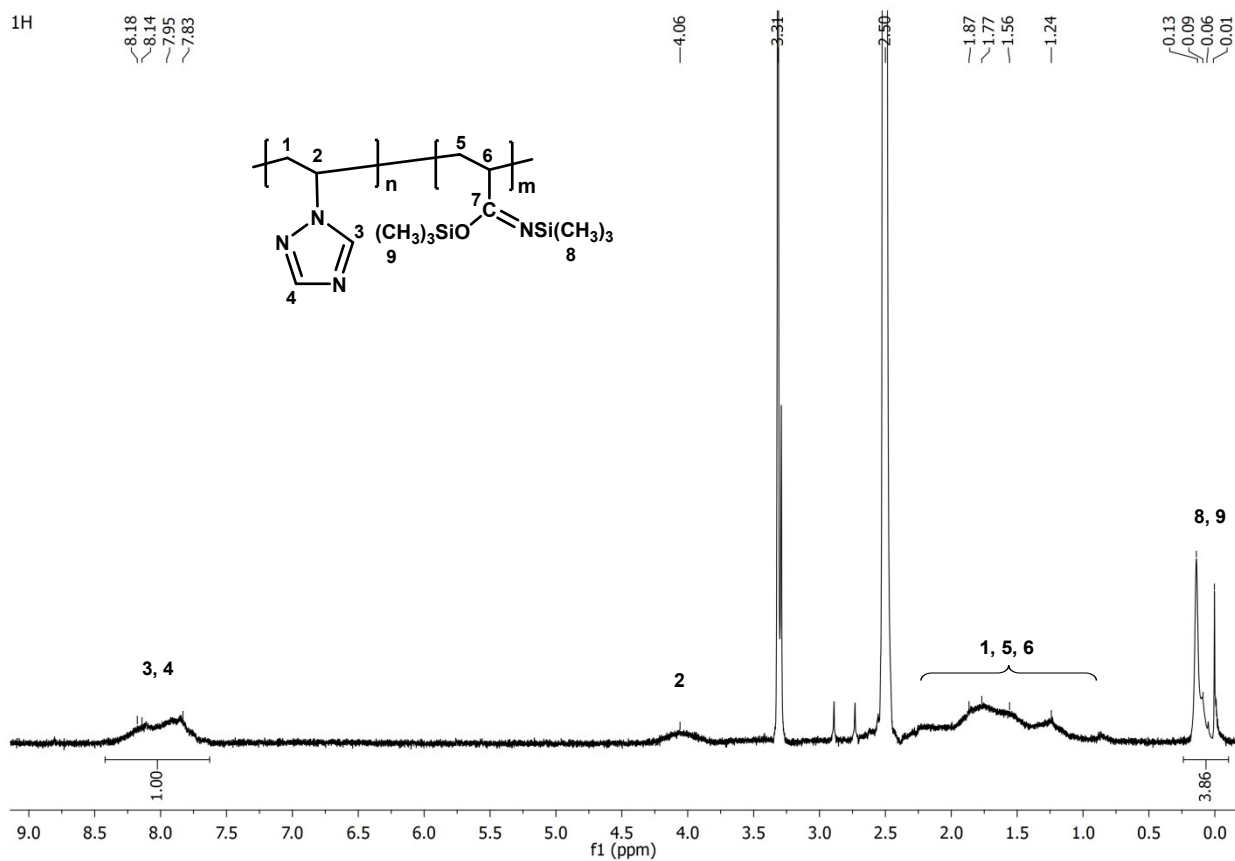

**Fig. S9** <sup>1</sup>H NMR spectrum of copolymer **P4** (400.13 MHz, DMSO-*d*<sub>6</sub>).

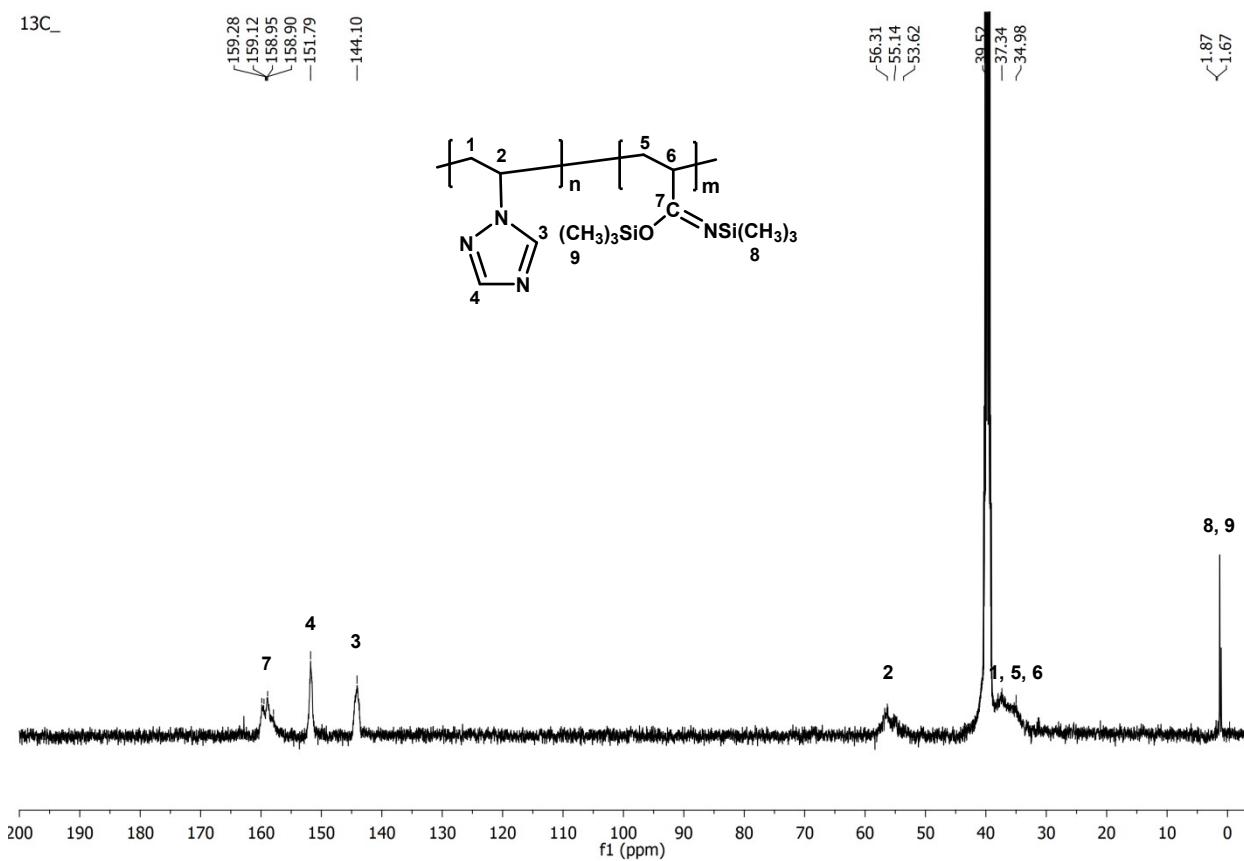

**Fig. S10** <sup>13</sup>C NMR spectrum of copolymer **P4** (100.62 MHz, DMSO-*d*<sub>6</sub>).

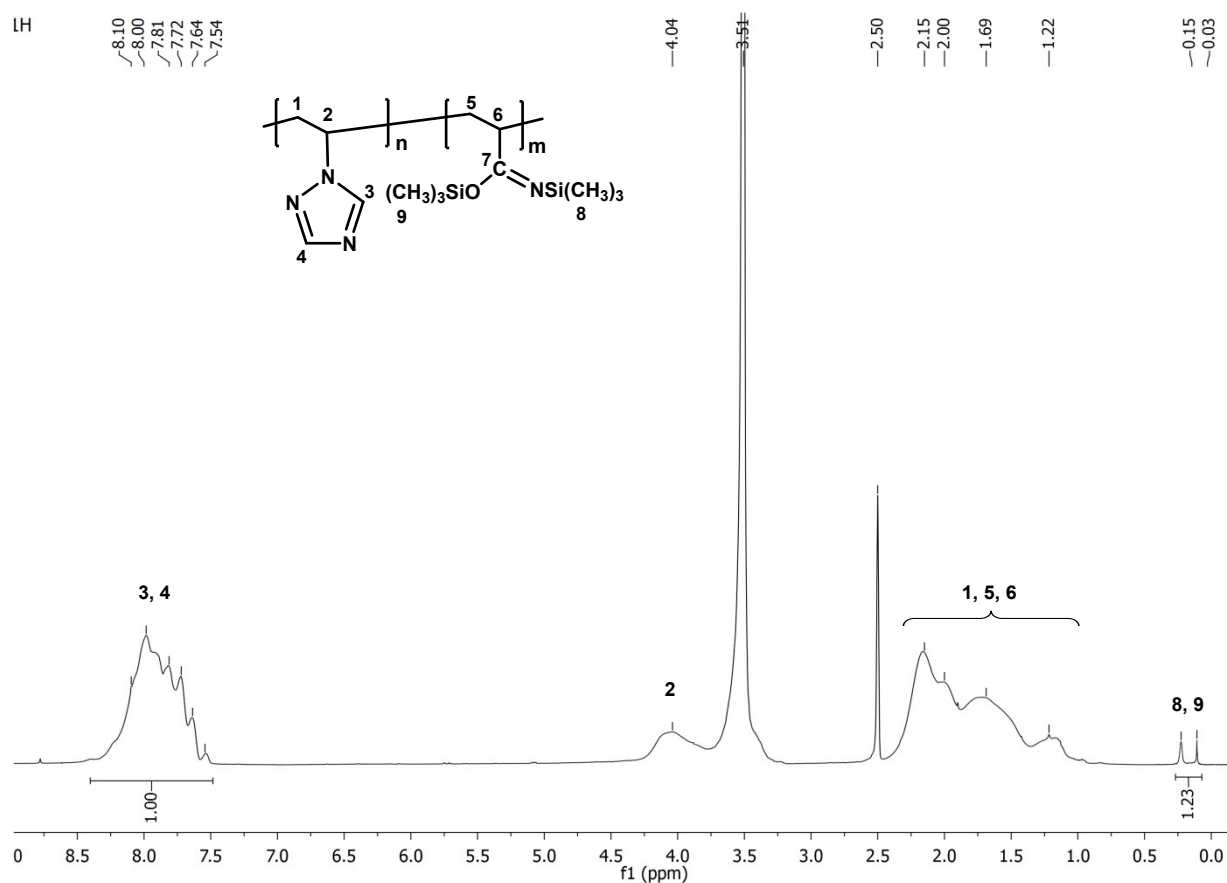

**Fig. S11** <sup>1</sup>H NMR spectrum of copolymer **P5** (400.13 MHz, DMSO-*d*<sub>6</sub>).

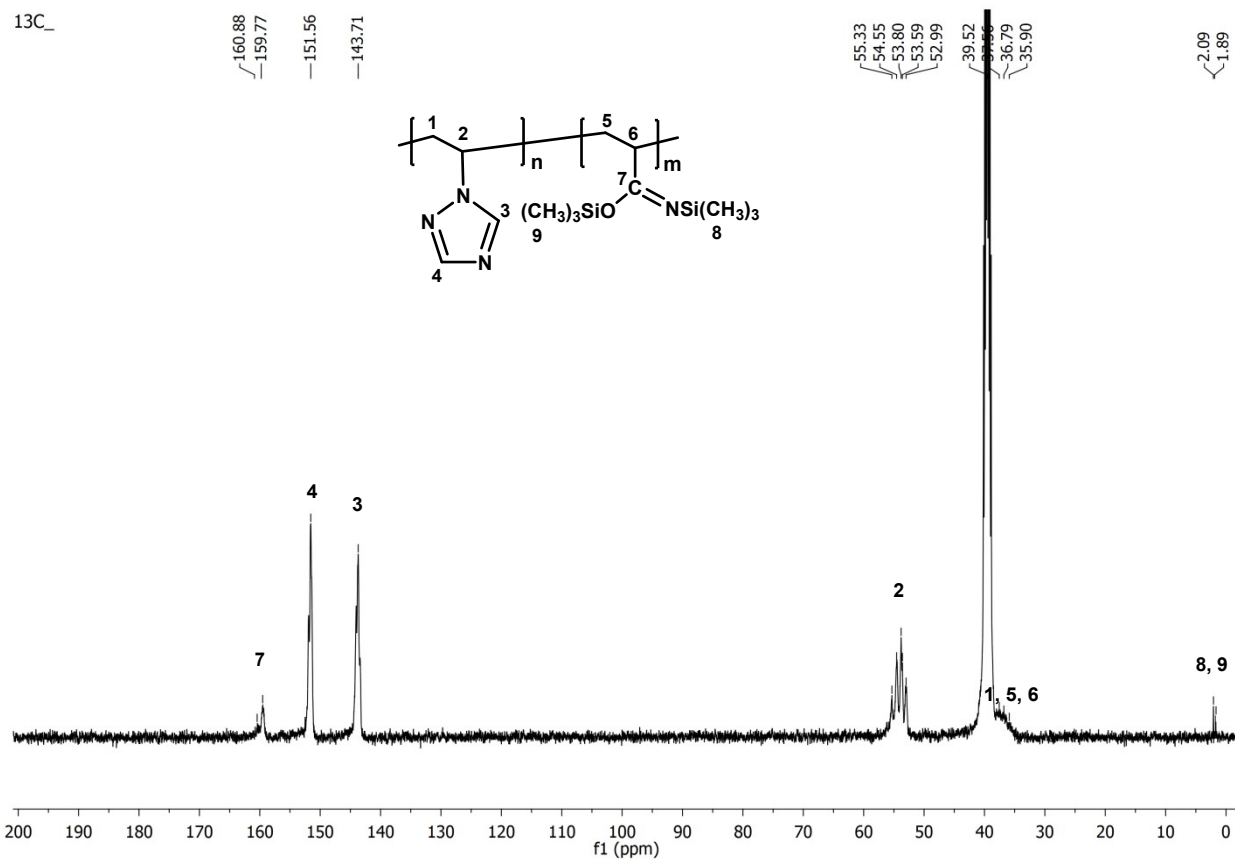

**Fig. S12** <sup>13</sup>C NMR spectrum of copolymer **P5** (100.62 MHz, DMSO-*d*<sub>6</sub>).

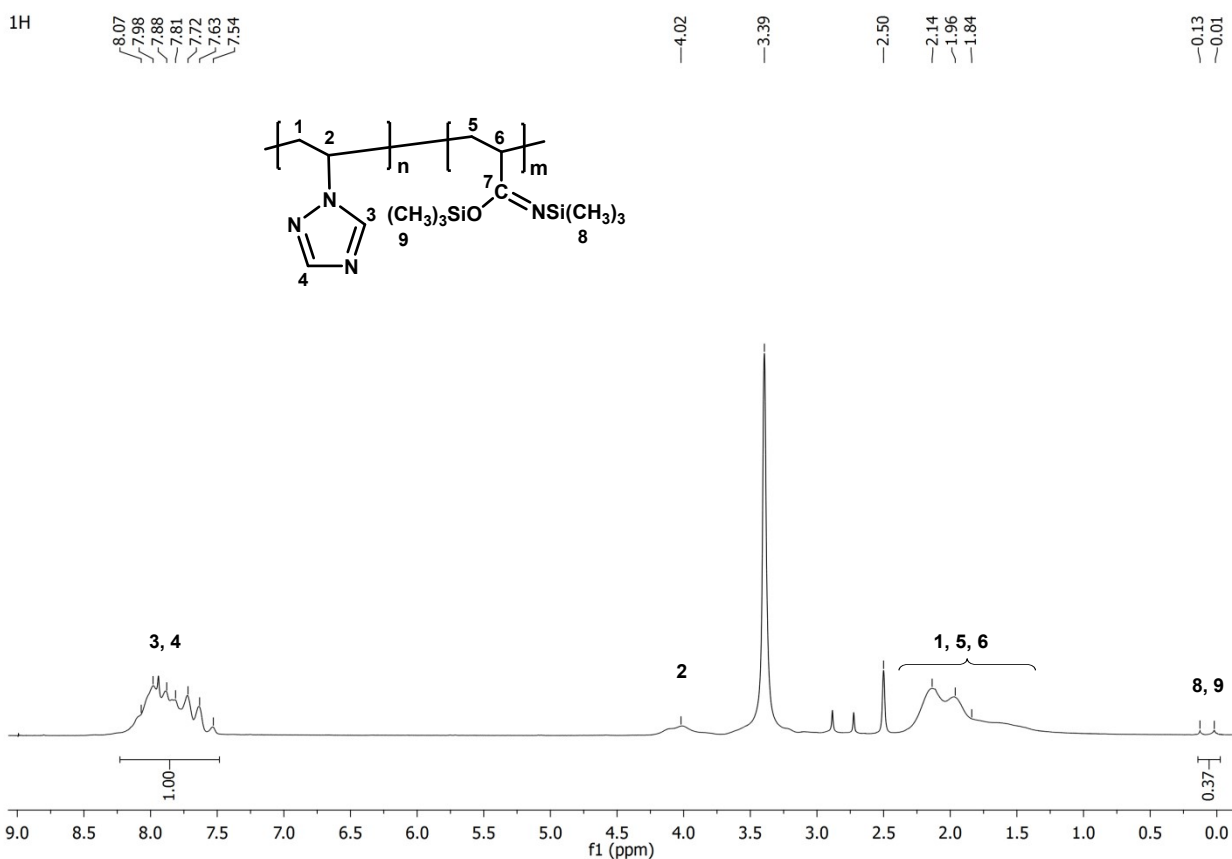

**Fig. S13** <sup>1</sup>H NMR spectrum of copolymer **P6** (400.13 MHz, DMSO-*d*<sub>6</sub>).

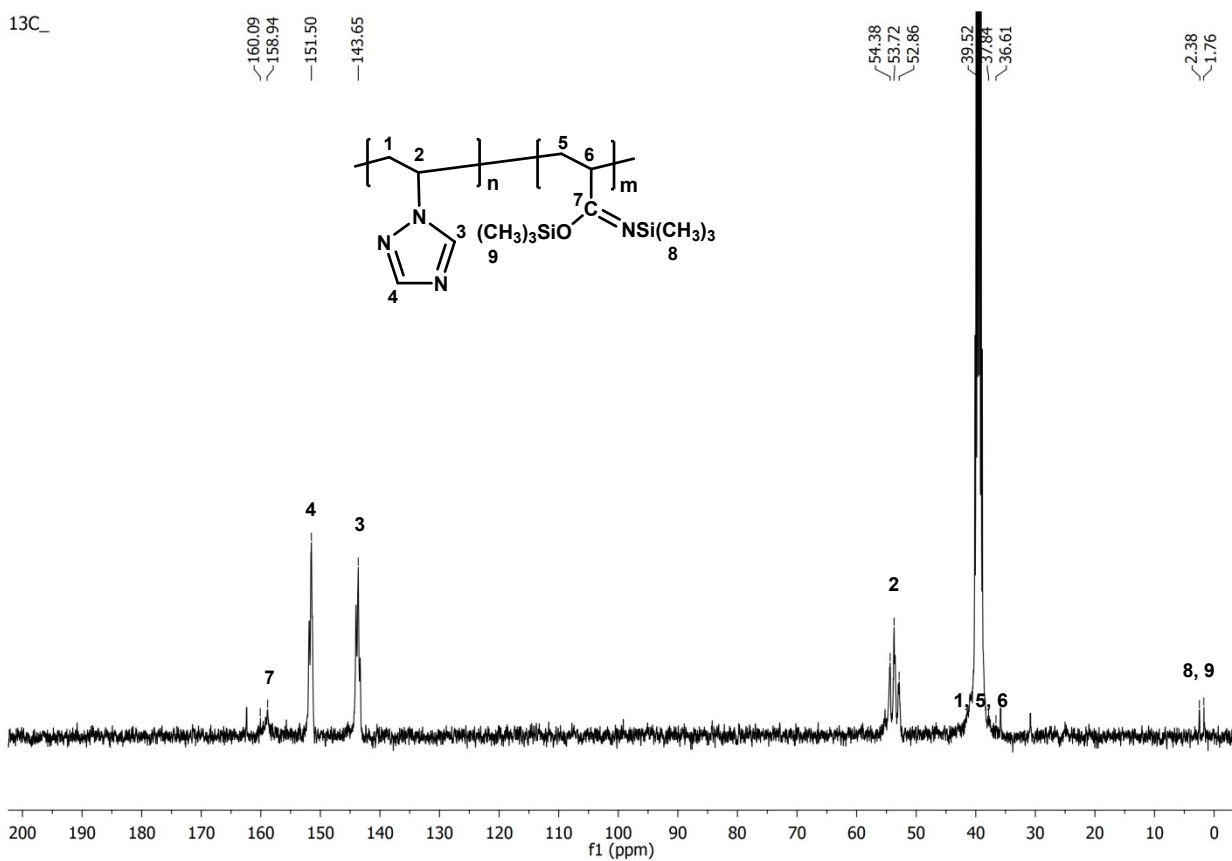

**Fig. S14** <sup>13</sup>C NMR spectrum of copolymer **P6** (100.62 MHz, DMSO-*d*<sub>6</sub>).



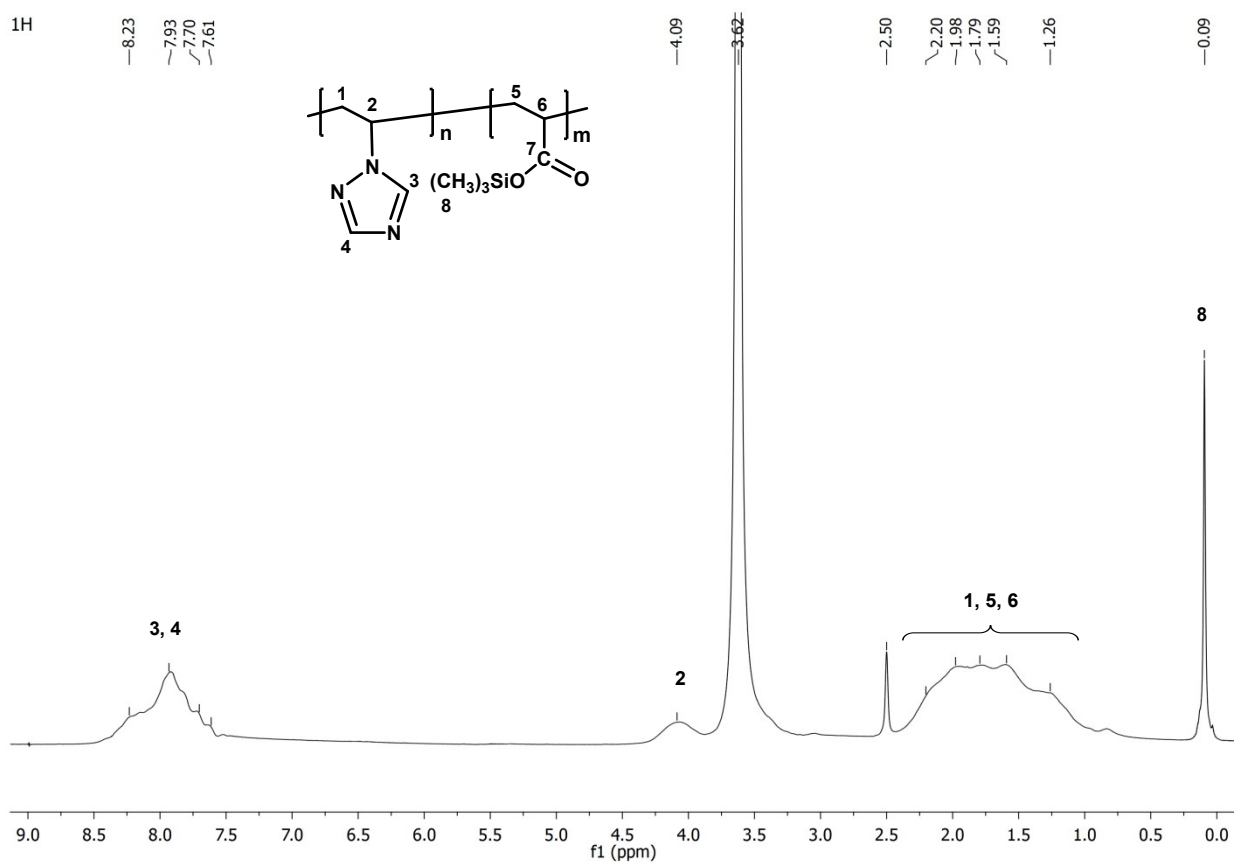

**Fig. S15** <sup>1</sup>H NMR spectrum of copolymer **MP2** (400.13 MHz, DMSO-*d*<sub>6</sub>).

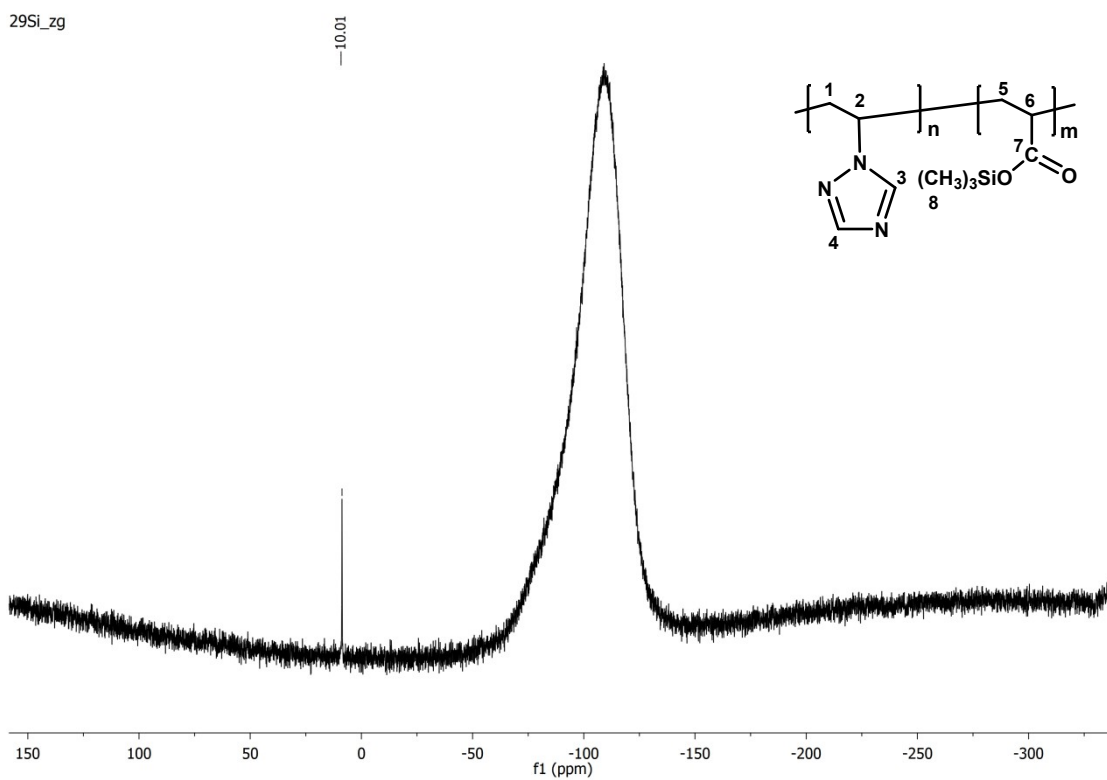

**Fig. S16** <sup>29</sup>Si NMR spectrum of copolymer **MP2** (79.50 MHz, DMSO-*d*<sub>6</sub>).

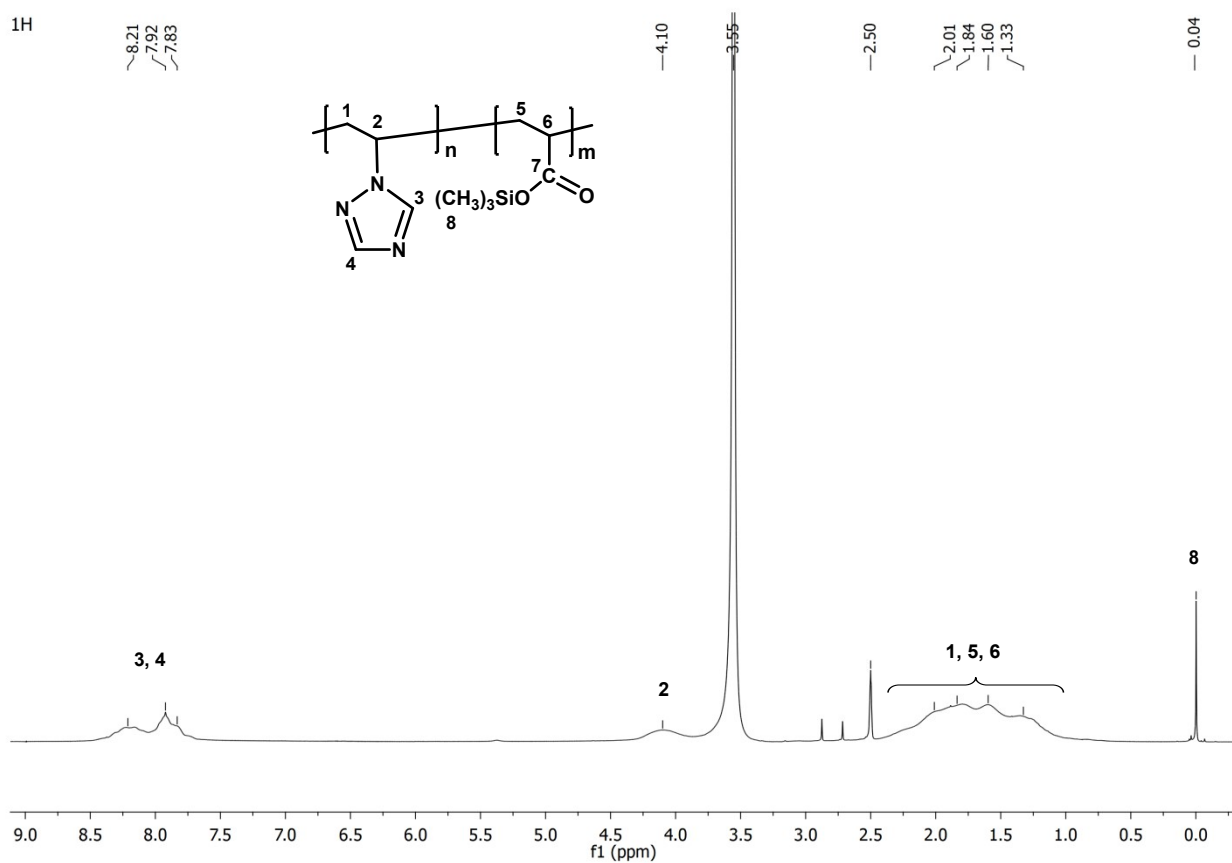

**Fig. S17** <sup>1</sup>H NMR spectrum of copolymer **MP3** (400.13 MHz, DMSO-*d*<sub>6</sub>).

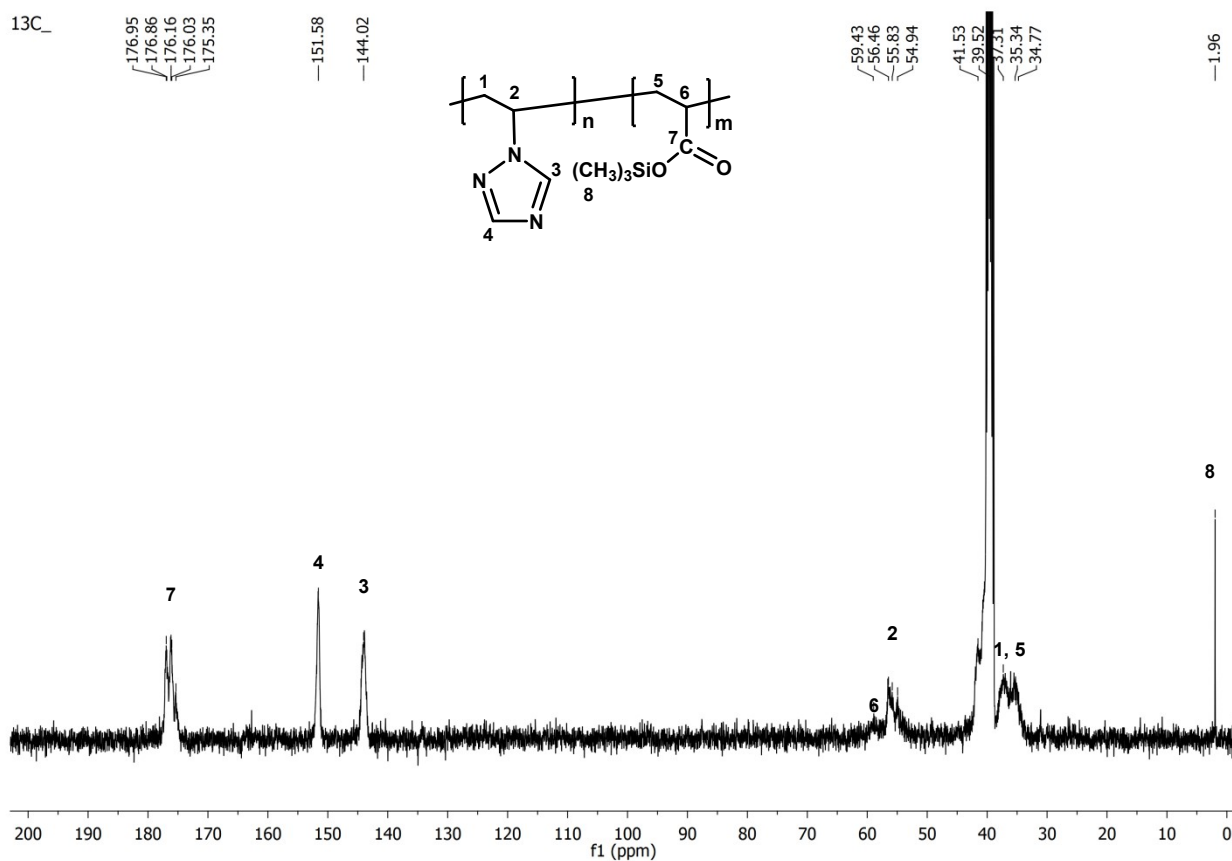

**Fig. S18** <sup>13</sup>C NMR spectrum of copolymer **MP3** (100.62 MHz, DMSO-*d*<sub>6</sub>).

29Si\_zg

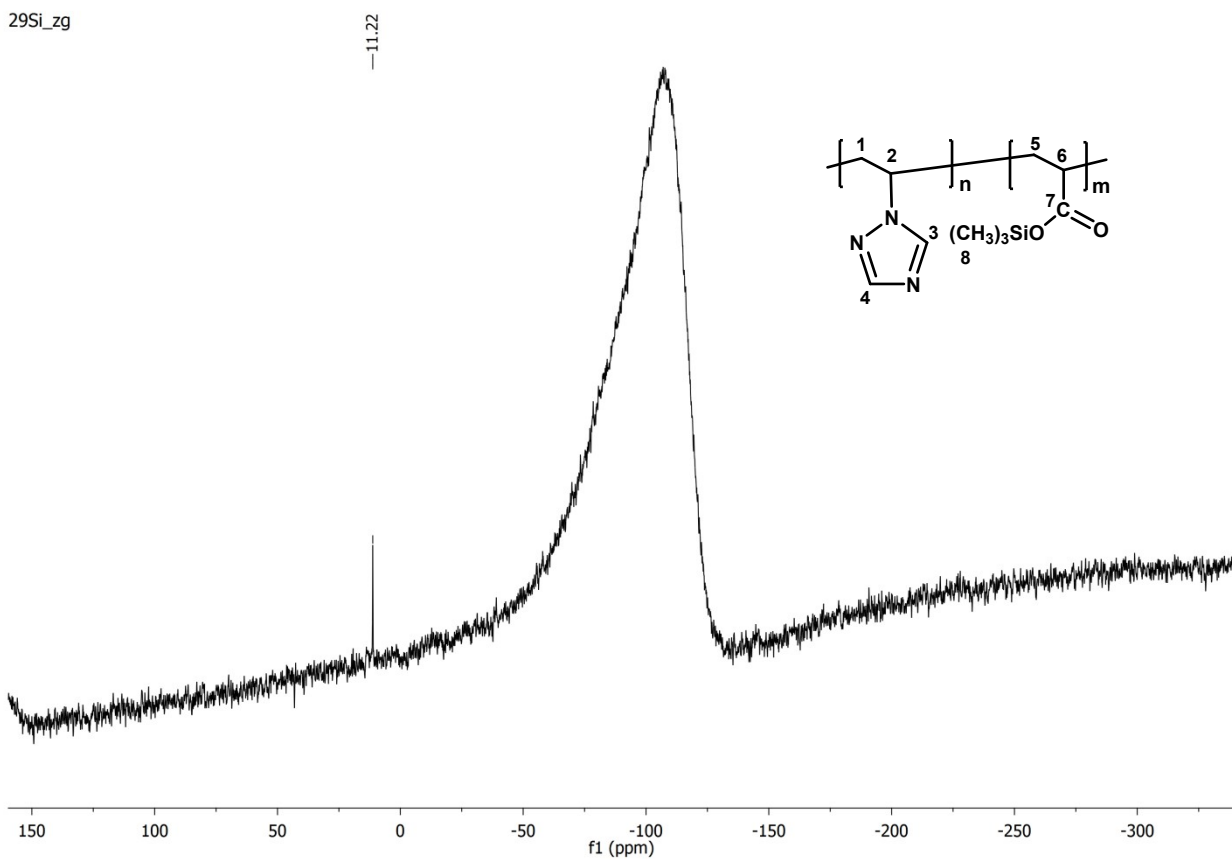

**Fig. S19**  $^{29}\text{Si}$  NMR spectrum of copolymer **MP3** (79.50 MHz,  $\text{DMSO-}d_6$ ).

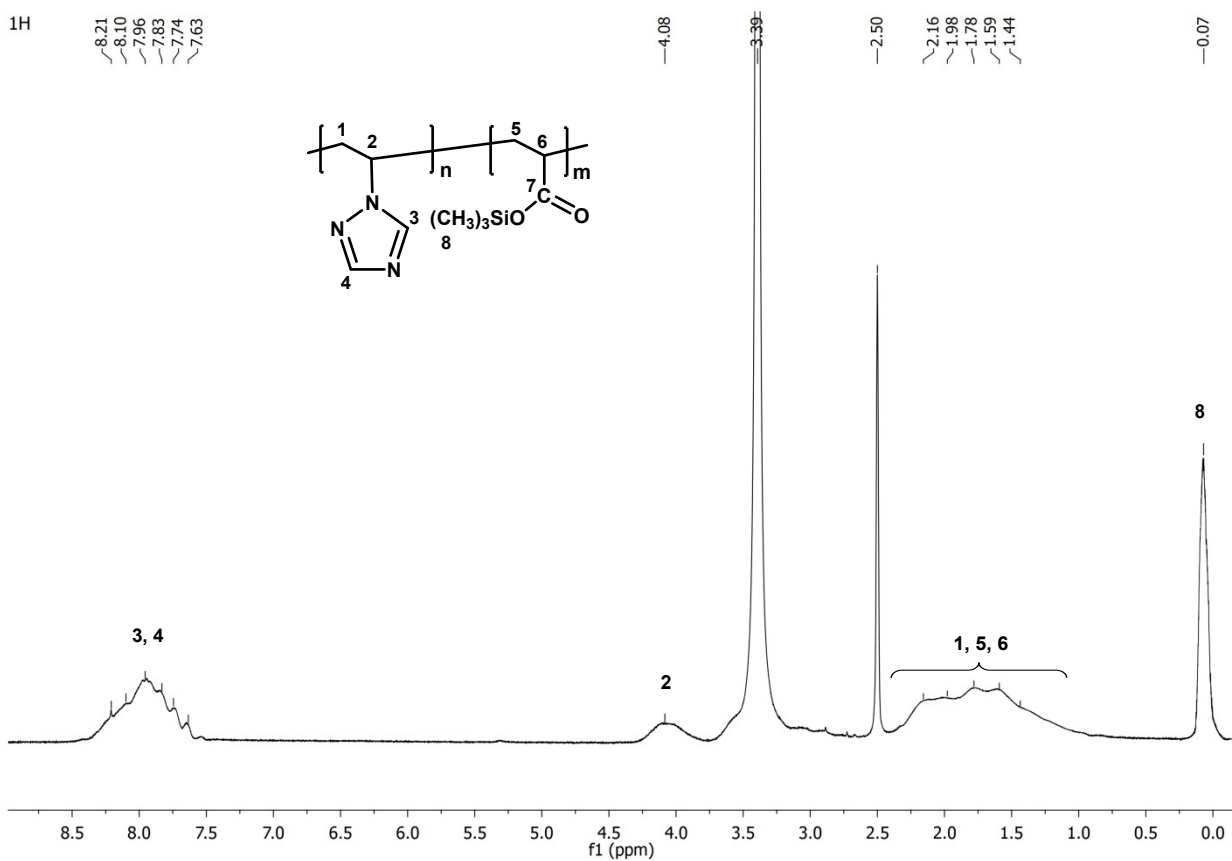

**Fig. S20**  $^1\text{H}$  NMR spectrum of copolymer **MP4** (400.13 MHz,  $\text{DMSO-}d_6$ ).

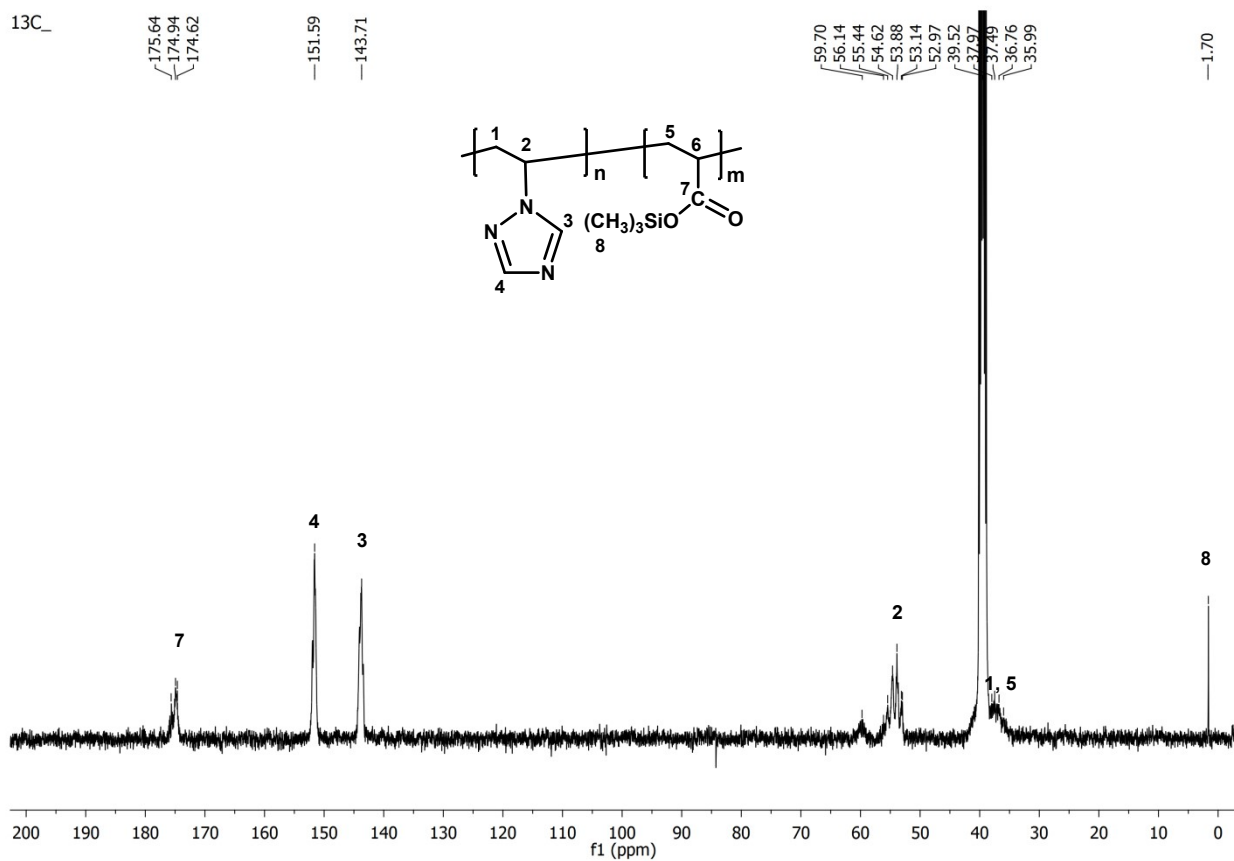

**Fig. S21**  $^{13}\text{C}$  NMR spectrum of copolymer **MP4** (100.62 MHz,  $\text{DMSO-}d_6$ ).

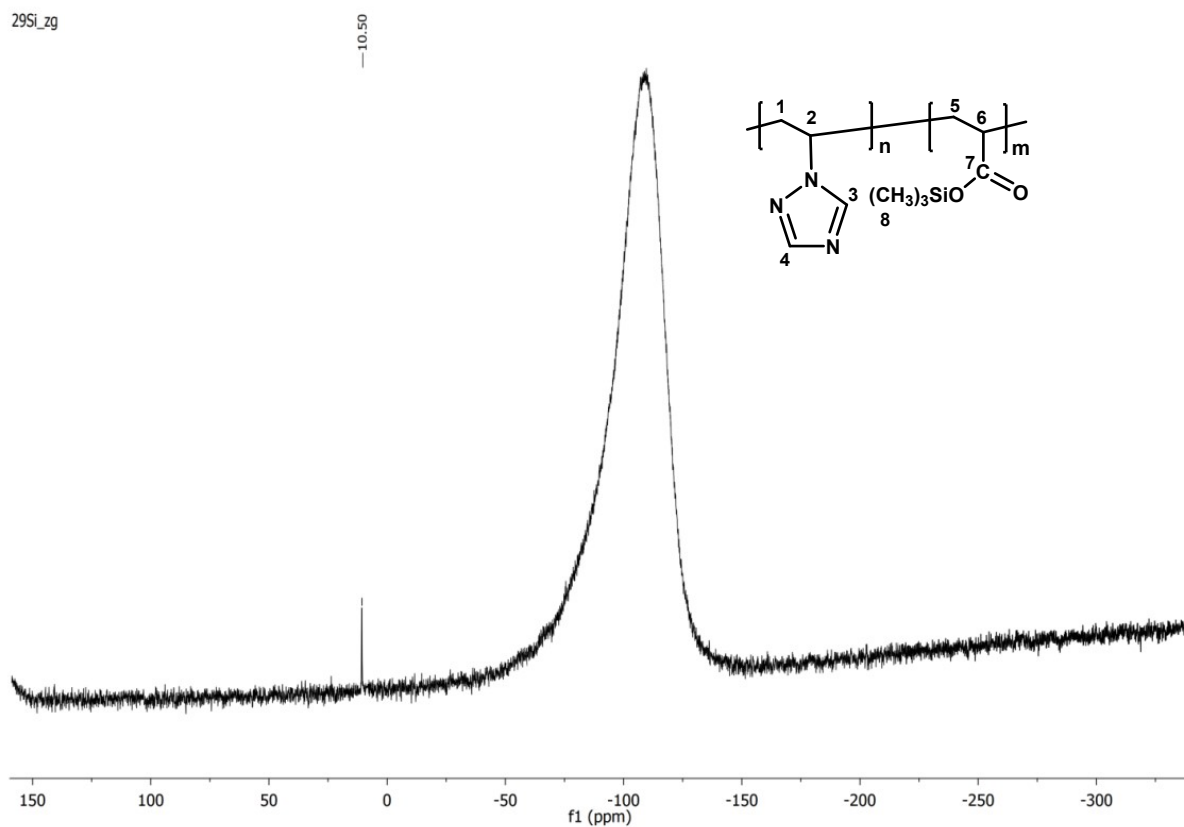

**Fig. S22**  $^{29}\text{Si}$  NMR spectrum of copolymer **MP4** (79.50 MHz,  $\text{DMSO-}d_6$ ).

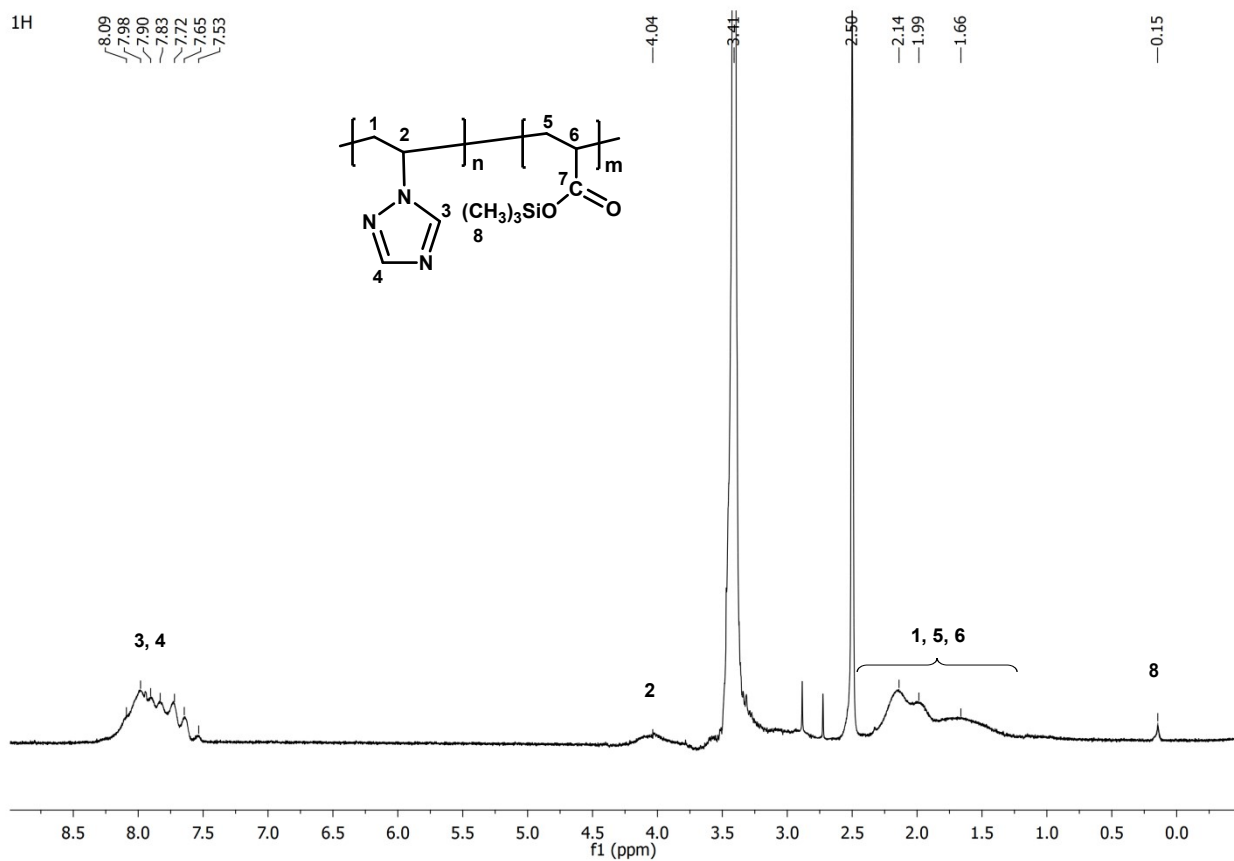

**Fig. S23** <sup>1</sup>H NMR spectrum of copolymer **MP5** (400.13 MHz, DMSO-*d*<sub>6</sub>).

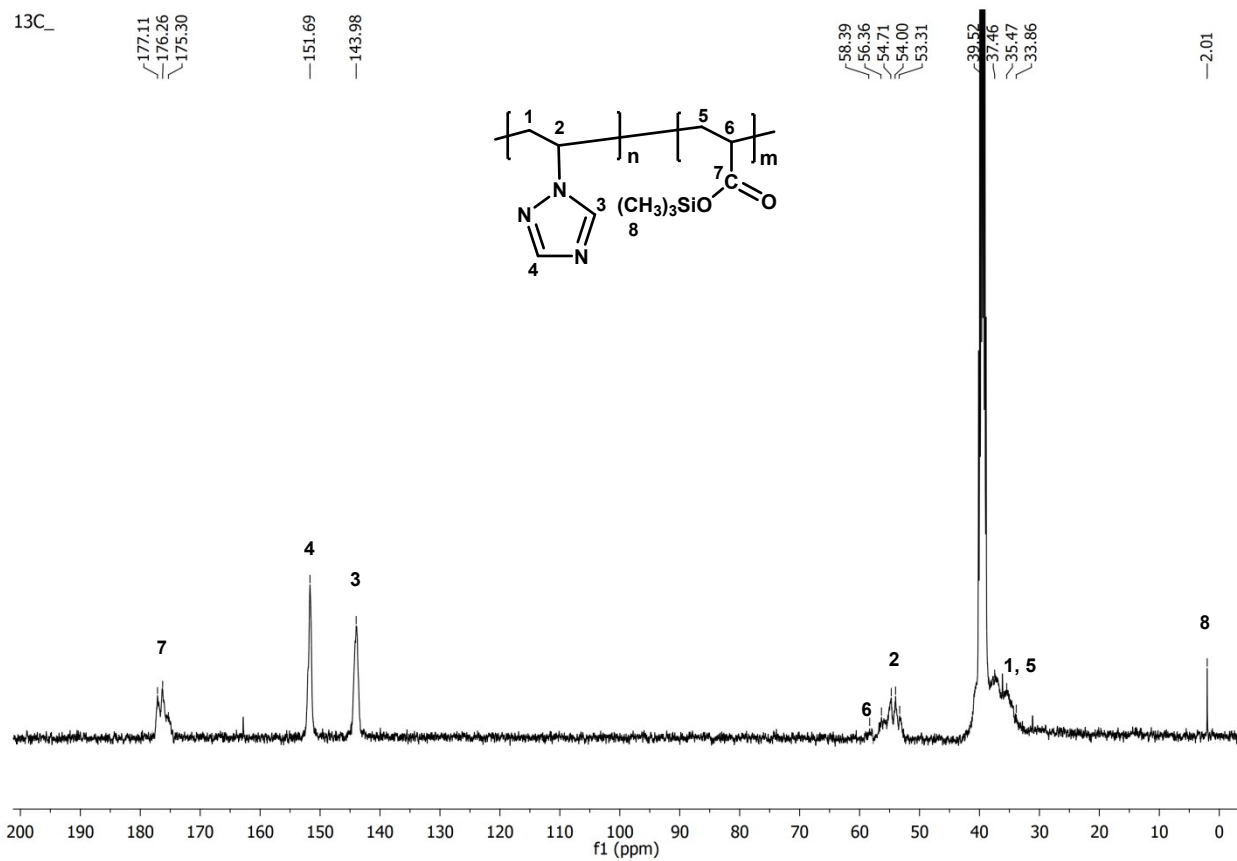

**Fig. S24** <sup>13</sup>C NMR spectrum of copolymer **MP5** (100.62 MHz, DMSO-*d*<sub>6</sub>).

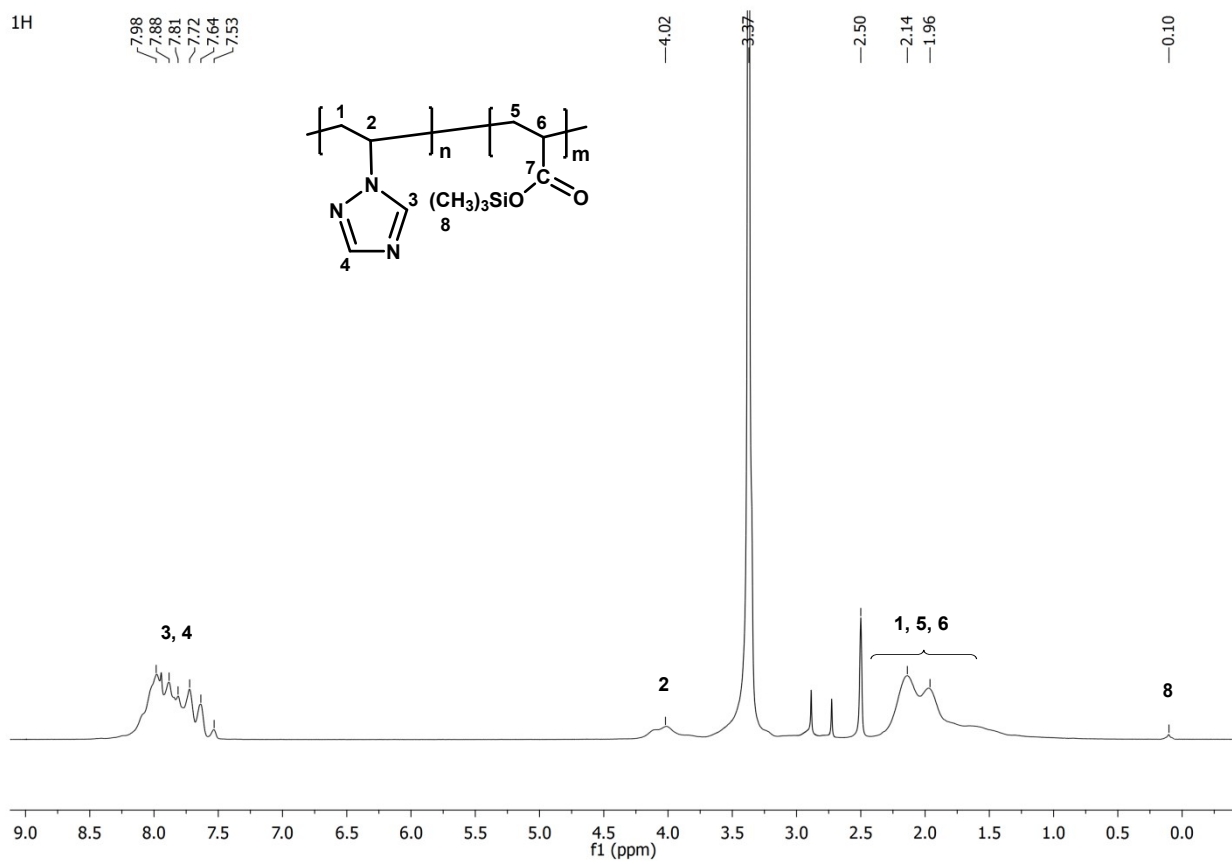

**Fig. S25** <sup>1</sup>H NMR spectrum of copolymer **MP6** (400.13 MHz, DMSO-*d*<sub>6</sub>).

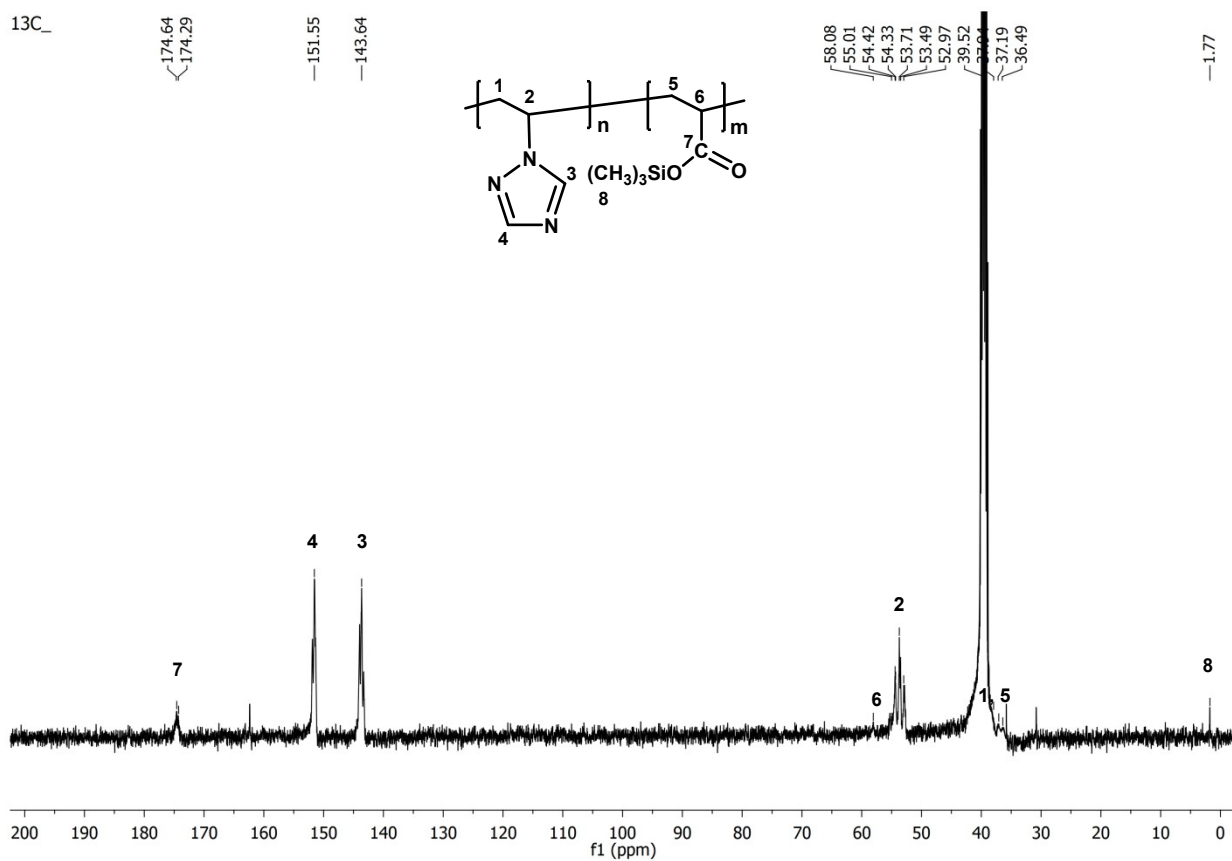

**Fig. S26** <sup>13</sup>C NMR spectrum of copolymer **MP6** (100.62 MHz, DMSO-*d*<sub>6</sub>).

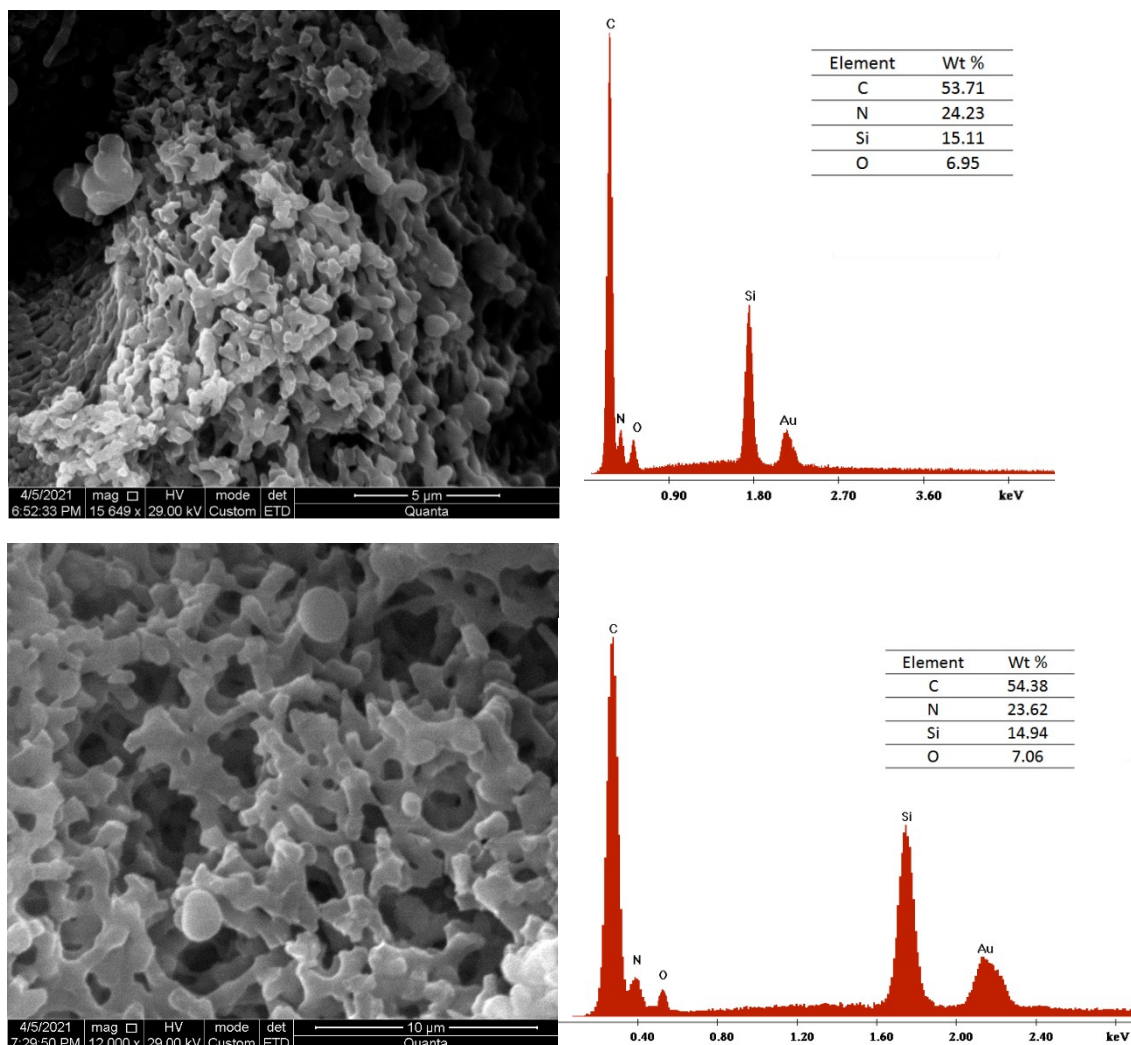

**Fig. S27** SEM and EDX of poly(VT-*co*-BTMSI) **P3** (various surface regions).

**Table S1.** Thermal stability of copolymers **P2–P6**

| Copolymer | Thermal stability, °C |
|-----------|-----------------------|
| <b>P2</b> | 220                   |
| <b>P3</b> | 230                   |
| <b>P4</b> | 265                   |
| <b>P5</b> | 290                   |
| <b>P6</b> | 300                   |

### Copolymerization constants

The following equation was used to determine the copolymerization constants:

$$\sqrt{kx} - \frac{1}{\sqrt{kx}} = r_1 \sqrt{\frac{x}{k}} - r_2 \sqrt{\frac{k}{x}}$$

where  $x = [M_1]/[M_2]$ ,  $k = [m_1][M_2]/[m_2][M_1]$ ;  $[m_i]$ ,  $[M_i]$  are concentrations of the component in the copolymer and in the initial monomer mixture.

Copolymerization constants have been determined up to 8% conversion.

**Table S2.** Calculation of copolymerization constants.

| F10 | F1C  | f1      | fm1     | fm2     |
|-----|------|---------|---------|---------|
| 0.1 | 0.19 | 0.19174 | -9.9343 | -41.878 |
| 0.3 | 0.49 | 0.49337 | -27.78  | -28.526 |
| 0.5 | 0.66 | 0.66285 | -37.171 | -18.907 |
| 0.7 | 0.81 | 0.81201 | -44.345 | -10.266 |
| 0.9 | 0.93 | 0.9204  | -46.157 | -3.9919 |

The copolymerization constants are  $r_{VT} = 1.361 \pm 0.078$  and  $r_{BTMSI} = 0.273 \pm 0.029$ .

*Elemental analysis data of MP2–MP6 copolymers:*

**MP2** – Found, %: C 48.04; H 7.45; N 13.28; Si 14.62. **MP3** – Found, %: C 48.14; H 7.38; N 25.13; Si 7.85. **MP4** – Found, %: C 48.18; H 6.53; N 29.87; Si 6.42. **MP5** – Found, %: C 47.03; H 6.07; N 36.08; Si 2.18. **MP6** – Found, %: C 48.76; H 5.83; N 40.44; Si 0.83.
